# Supplementary material for: Tumor Mutational Burden, Toxicity, and Response of Immune Checkpoint Inhibitors Targeting PD(L)1, CTLA-4, and Combination: A Meta-regression Analysis
Source: Oxford University Press journal article supplement (doi:10.1158/1078-0432.ccr-20-0458), 2020-06-25
Supplement: 10780432ccr200458-sup-236800_3_supp_6337488_qbcxtt.docx [file 10780432ccr200458-sup-236800_3_supp_6337488_qbcxtt.docx]

**eTable 1**. List of 29 solid tumor types or subtypes

**eTable 2**. List of studies with anti-PD-1/PD-L1 monotherapy, anti-CTLA-4 monotherapy, and anti-PD-1/PD-L1 plus anti-CTLA-4 therapy

**eTable 3**. Pooled response and toxicity rates for each tumor type within each treatment category (single: anti-PD-1/PD-L1; dual: anti-PD-1/PD-L1 plus anti-CTLA-4)

**eTable 4**. Descriptive statistics of median overall survival for each tumor type within each treatment category (single: anti-PD-1/PD-L1, anti-CTLA-4; dual: anti-PD-1/PD-L1 plus anti-CTLA-4)

**eFigure 1**. Forest plot of response rates among studies with anti-PD-1/PD-L1 monotherapy by tumor type

**eFigure 2**. Forest plot of response rates among studies with anti-CTLA-4 monotherapy by tumor type

**eFigure 3**. Forest plot of response rates among studies with anti-PD-1/PD-L1 plus anti-CLTA-4 therapy by tumor type

**eFigure 4**. Forest plot of toxicity rates among studies with anti-PD-1/PD-L1 monotherapy by tumor type

**eFigure 5**. Forest plot of toxicity rates among studies with anti-CTLA-4 monotherapy by tumor type

**eFigure 6**. Forest plot of toxicity rates among studies with anti-PD-1/PD-L1 plus anti-CLTA-4 therapy by tumor type

**eFigure 7**. Forest plot of hazard ratios for overall survival among studies with anti-PD-1/PD-L1 monotherapy

**eTable 1**. List of 29 solid tumor types or subtypes

| Adrenocortical Carcinoma | Esophagogastric Carcinoma | Ocular/Uveal Melanoma |
| --- | --- | --- |
| Anal Cancer | Germ Cell Tumor | Other MSI |
| Biliary Tract Cancer | Glioblastoma | Ovarian Cancer |
| Bladder Cancer | Head and Neck | Pancreatic Cancer |
| Breast Carcinoma | Hepatocellular Carcinoma | Prostate Cancer |
| Cervical Cancer | Melanoma | Renal Cell Carcinoma |
| Colorectal Cancer – MSI | Merkel Cell Carcinoma | Sarcoma |
| Colorectal Cancer – MSS | Mesothelioma | Small Cell Lung Cancer |
| Cutaneous Squamous Cell Carcinoma | Nasopharyngeal | Thymic |
| Endometrial Cancer | Non-Small Cell Lung Cancer |  |

**eTable 2**. List of studies with anti-PD-1/PD-L1 monotherapy, anti-CTLA-4 monotherapy, and anti-PD-1/PD-L1 plus anti-CTLA-4 therapy

| **List of studies with anti-PD-1/PD-L1 monotherapy** | | | | |
| --- | --- | --- | --- | --- |
| **First Author** | **Journal** | **Year** | **Drug** | **General Tumor Type** |
| Le Tourneau | Annals of Oncology | 2017 | Avelumab | Adrenocortical Carcinoma |
| Morris | Lancet Oncology | 2017 | Nivolumab | Anal Cancer |
| Ioka | Journal of Clinical Oncology | 2019 | Durvalumab | Biliary Tract Cancer |
| Kim | Annals of Oncology | 2018 | Nivolumab | Biliary Tract Cancer |
| Ueno | Annals of Oncology | 2018 | Pembrolizumab | Biliary Tract Cancer |
| Rosenberg | Lancet | 2016 | Atezolizumab | Bladder Cancer |
| Apolo | Journal of Clinical Oncology | 2017 | Avelumab | Bladder Cancer |
| Powles | JAMA Oncology | 2017 | Durvalumab | Bladder Cancer |
| Sharma | Lancet Oncology | 2017 | Nivolumab | Bladder Cancer |
| Bellmunt | The New England Journal of Medicine | 2017 | Pembrolizumab | Bladder Cancer |
| Schmid | Cancer Research | 2017 | Atezolizumab | Breast Carcinoma |
| Dirix | Breast Cancer Research and Treatment | 2018 | Avelumab | Breast Carcinoma |
| Rischin | Annals of Oncology | 2018 | Cemiplimab | Cervical Cancer |
| Santin | Journal of Clinical Oncology | 2018 | Nivolumab | Cervical Cancer |
| Chung | Journal of Clinical Oncology | 2018 | Pembrolizumab | Cervical Cancer |
| Overman | Journal of Clinical Oncology | 2018 | Nivolumab | Colorectal Cancer – MSI |
| Le | Annals of Oncology | 2018 | Pembrolizumab | Colorectal Cancer – MSI |
| Eng | Lancet | 2019 | Atezolizumab | Colorectal Cancer – MSS |
| Brahmer | Journal of Clinical Oncology | 2010 | Nivolumab | Colorectal Cancer – MSS |
| Le | The New England Journal of Medicine | 2015 | Pembrolizumab | Colorectal Cancer – MSS |
| Migden | The New England Journal of Medicine | 2018 | Cemiplimab | Cutaneous Squamous Cell Carcinoma |
| Maubec | Journal of Clinical Oncology | 2018 | Pembrolizumab | Cutaneous Squamous Cell Carcinoma |
| Fleming | Journal of Clinical Oncology | 2017 | Atezolizumab | Endometrial Cancer |
| Chung | Journal of Clinical Oncology | 2016 | Avelumab | Esophagogastric Carcinoma |
| Kang | Lancet | 2017 | Nivolumab | Esophagogastric Carcinoma |
| Fuchs | JAMA Oncology | 2018 | Pembrolizumab | Esophagogastric Carcinoma |
| Adra | Journal of Clinical Oncology | 2017 | Pembrolizumab | Germ Cell Tumor |
| Reardon | Journal of Clinical Oncology | 2017 | Durvalumab | Glioblastoma |
| Reardon | Neuro-Oncology | 2017 | Nivolumab | Glioblastoma |
| Ferris | The New England Journal of Medicine | 2016 | Nivolumab | Head and Neck |
| Bauml | Journal of Clinical Oncology | 2017 | Pembrolizumab | Head and Neck |
| Wainberg | Journal of Clinical Oncology | 2017 | Durvalumab | Hepatocellular Carcinoma |
| El-Khoueiry | Lancet | 2017 | Nivolumab | Hepatocellular Carcinoma |
| Zhu | Lancet Oncology | 2018 | Pembrolizumab | Hepatocellular Carcinoma |
| Wolchok | The New England Journal of Medicine | 2017 | Nivolumab | Melanoma |
| Robert | The New England Journal of Medicine | 2015 | Pembrolizumab | Melanoma |
| Kaufman | Cancer Research | 2017 | Avelumab | Merkel Cell Carcinoma |
| Topalian | Cancer Research | 2017 | Nivolumab | Merkel Cell Carcinoma |
| Nghiem | The New England Journal of Medicine | 2016 | Pembrolizumab | Merkel Cell Carcinoma |
| Hassan | Journal of Clinical Oncology | 2017 | Avelumab | Mesothelioma |
| Scherpereel | Journal of Clinical Oncology | 2017 | Nivolumab | Mesothelioma |
| Kindler | Journal of Clinical Oncology | 2017 | Pembrolizumab | Mesothelioma |
| Ma | Journal of Clinical Oncology | 2018 | Nivolumab | Nasopharyngeal |
| Rittmeyer | Lancet | 2017 | Atezolizumab | Non-Small Cell Lung Cancer |
| Gulley | Lancet Oncology | 2017 | Avelumab | Non-Small Cell Lung Cancer |
| Borghaei | The New England Journal of Medicine | 2015 | Nivolumab | Non-Small Cell Lung Cancer |
| Garon | The New England Journal of Medicine | 2015 | Pembrolizumab | Non-Small Cell Lung Cancer |
| Rittmeyer | Lancet | 2017 | Atezolizumab | Non-Small Cell Lung Cancer |
| Gulley | Lancet Oncology | 2017 | Avelumab | Non-Small Cell Lung Cancer |
| Brahmer | The New England Journal of Medicine | 2015 | Nivolumab | Non-Small Cell Lung Cancer |
| Garon | The New England Journal of Medicine | 2015 | Pembrolizumab | Non-Small Cell Lung Cancer |
| Azad | Journal for ImmunoTherapy of Cancer | 2017 | Nivolumab | Other MSI |
| Diaz | Annals of Oncology | 2017 | Pembrolizumab | Other MSI |
| Disis | Journal of Clinical Oncology | 2017 | Avelumab | Ovarian Cancer |
| Brahmer | The New England Journal of Medicine | 2012 | BMS-936559 | Ovarian Cancer |
| Hamanishi | Journal of Clinical Oncology | 2015 | Nivolumab | Ovarian Cancer |
| Matulonis | Annals of Oncology | 2019 | Pembrolizumab | Ovarian Cancer |
| Brahmer | The New England Journal of Medicine | 2012 | BMS-936559 | Pancreatic Cancer |
| O’Reilly | Journal of Clinical Oncology | 2018 | Durvalumab | Pancreatic Cancer |
| Kim | Journal of Clinical Oncology | 2018 | Atezolizumab | Prostate Cancer |
| Fakhrejahani | Journal of Clinical Oncology | 2017 | Avelumab | Prostate Cancer |
| Topalian | The New England Journal of Medicine | 2012 | Nivolumab | Prostate Cancer |
| De Bono | Journal of Clinical Oncology | 2018 | Pembrolizumab | Prostate Cancer |
| McDermott | Journal of Clinical Oncology | 2016 | Atezolizumab | Renal Cell Carcinoma |
| Motzer | The New England Journal of Medicine | 2015 | Nivolumab | Renal Cell Carcinoma |
| McDermott | Journal of Clinical Oncology | 2018 | Pembrolizumab | Renal Cell Carcinoma |
| D’Angelo | Lancet Oncology | 2018 | Nivolumab | Sarcoma |
| Tawbi | Lancet Oncology | 2017 | Pembrolizumab | Sarcoma |
| Sequist | Annals of Oncology | 2016 | Atezolizumab | Small Cell Lung Cancer |
| Reck | Annals of Oncology | 2018 | Nivolumab | Small Cell Lung Cancer |
| Chung | Journal of Clinical Oncology | 2018 | Pembrolizumab | Small Cell Lung Cancer |
| Seto | Journal of Thoracic Oncology | 2018 | Nivolumab | Thymic |
| Giaccone | Journal of Clinical Oncology | 2017 | Pembrolizumab | Thymic |
| Algazi | Cancer | 2016 | anti-PD-1/anti-PD-L1 | Ocular/Uveal melanoma |
| Namikawa | Annals of Oncology | 2017 | Nivolumab | Ocular/Uveal melanoma |

| **List of studies with anti-CTLA-4 monotherapy** | | | | |
| --- | --- | --- | --- | --- |
| **First Author** | **Journal** | **Year** | **Drug** | **General Tumor Type** |
| Lheureux | Journal of Clinical Oncology | 2017 | Ipilimumab | Cervical Cancer |
| Chung | Journal of Clinical Oncology | 2010 | Tremelimumab | Colorectal Cancer – MSS |
| Bang | Clinical Cancer Research | 2017 | Ipilimumab | Esophagogastric Carcinoma |
| Ralph | Clinical Cancer Research | 2010 | Tremelimumab | Esophagogastric Carcinoma |
| Sangro | Journal of Hepatology | 2013 | Tremelimumab | Hepatocellular Carcinoma |
| Wolchok | The New England Journal of Medicine | 2017 | Ipilimumab | Melanoma |
| Ribas | Journal of Clinical Oncology | 2013 | Tremelimumab | Melanoma |
| Maio | Lancet Oncology | 2017 | Tremelimumab | Mesothelioma |
| Zatloukal | Journal of Clinical Oncology | 2016 | Tremelimumab | Non-Small Cell Lung Cancer |
| Joshua | Melanoma Research | 2015 | Tremelimumab | Ocular/Uveal melanoma |
| Le | Journal of Immunotherapy | 2014 | Ipilimumab | Pancreatic Cancer |
| Sharma | Journal of Clinical Oncology | 2018 | Tremelimumab | Pancreatic Cancer |
| Slovin | Annals of Oncology | 2013 | Ipilimumab | Prostate Cancer |
| Yang | Journal of Immunotherapy | 2007 | Ipilimumab | Renal Cell Carcinoma |

| **List of studies with anti-PD-1/PD-L1 plus anti-CTLA-4 therapy** | | | | |
| --- | --- | --- | --- | --- |
| **First Author** | **Journal** | **Year** | **Drug** | **General Tumor Type** |
| Ioka | Journal of Clinical Oncology | 2019 | Durva/Treme | Biliary Tract Cancer |
| Balar | Cancer Research | 2018 | Durva/Treme | Bladder Cancer |
| Rosenberg | Annals of Oncology | 2018 | Ipi/Nivo | Bladder Cancer |
| Santa-Maria | Journal of Clinical Oncology | 2017 | Durva/Treme | Breast Carcinoma |
| Callahan | Journal of Clinical Oncology | 2017 | Durva/Treme | Cervical Cancer |
| Overman | Journal of Clinical Oncology | 2018 | Ipi/Nivo | Colorectal Cancer – MSI |
| Chen | Journal of Clinical Oncology | 2019 | Durva/Treme | Colorectal Cancer – MSS |
| Janjigian | Journal of Clinical Oncology | 2018 | Ipi/Nivo | Esophagogastric Carcinoma |
| Omuro | Neuro Oncology | 2018 | Ipi/Nivo | Glioblastoma |
| Kelley | Journal of Clinical Oncology | 2017 | Durva/Treme | Hepatocellular Carcinoma |
| Wolchok | The New England Journal of Medicine | 2017 | Ipi/Nivo | Melanoma |
| Long | Lancet Oncology | 2017 | Ipi/Pembro | Melanoma |
| Calabro | Lancet Respiratory Medicine | 2018 | Durva/Treme | Mesothelioma |
| Disselhorst | Lancet Respiratory Medicine | 2019 | Ipi/Nivo | Mesothelioma |
| Antonia | Lancet Oncology | 2016 | Durva/Treme | Non-Small Cell Lung Cancer |
| Hellmann | Lancet Oncology | 2017 | Ipi/Nivo | Non-Small Cell Lung Cancer |
| Gubens | Journal of Clinical Oncology | 2017 | Ipi/Pembro | Non-Small Cell Lung Cancer |
| Piulats Rodriguez | Annals of Oncology | 2018 | Ipi/Nivo | Ocular/Uveal melanoma |
| Callahan | Journal of Clinical Oncology | 2017 | Durva/Treme | Ovarian Cancer |
| Burger | International Journal of Gynecologic Cancer Society | 2018 | Ipi/Nivo | Ovarian Cancer |
| O’Reilly | Journal of Clinical Oncology | 2018 | Durva/Treme | Pancreatic Cancer |
| Sharma | Journal of Clinical Oncology | 2019 | Ipi/Nivo | Prostate Cancer |
| Callahan | Journal of Clinical Oncology | 2017 | Durva/Treme | Renal Cell Carcinoma |
| Motzer | The New England Journal of Medicine | 2018 | Ipi/Nivo | Renal Cell Carcinoma |
| Atkins | Journal of Clinical Oncology | 2017 | Ipi/Pembro | Renal Cell Carcinoma |
| D’Angelo | Lancet Oncology | 2018 | Ipi/Nivo | Sarcoma |
| Cho | Journal of Clinical Oncology | 2018 | Durva/Treme | Small Cell Lung Cancer |
| Hellmann | Journal of Clinical Oncology | 2017 | Ipi/Nivo | Small Cell Lung Cancer |

**eTable 3**. Pooled response and toxicity rates for each tumor type within each treatment category (single: anti-PD-1/PD-L1; dual: anti-PD-1/PD-L1 plus anti-CTLA-4)

|  | | **Response Rate** | | | **Toxicity Rate** | | |
| --- | --- | --- | --- | --- | --- | --- | --- |
| **General Tumor Type** | **TMB (median)** | **Single** | **Dual** | **Difference** | **Single** | **Dual** | **Difference** |
| Ocular/Uveal melanoma | 1.3000 | 0.0399 | 0.1200 | 0.0801 | 0.1250 | 0.5400 | 0.4150 |
| Pancreatic Cancer | 1.8000 | 0.0485 | 0.0312 | -0.0172 | 0.0606 | 0.2188 | 0.1581 |
| Mesothelioma | 1.8000 | 0.1400 | 0.2692 | 0.1291 | 0.0833 | 0.2552 | 0.1719 |
| Colorectal Cancer – MSS | 2.0000 | 0.0142 | 0.0084 | -0.0058 | 0.2518 | 0.6356 | 0.3838 |
| Sarcoma | 2.2134 | 0.0831 | 0.1579 | 0.0748 | 0.1905 | 0.1429 | -0.0476 |
| Biliary Tract Cancer | 2.5000 | 0.0656 | 0.1077 | 0.0420 | 0.1589 | 0.2308 | 0.0719 |
| Renal Cell Carcinoma | 2.7000 | 0.2446 | 0.2765 | 0.0319 | 0.1851 | 0.3597 | 0.1746 |
| Prostate Cancer | 2.7000 | 0.0475 | 0.1698 | 0.1223 | 0.1297 | 0.4906 | 0.3608 |
| Glioblastoma | 2.7000 | 0.0844 | 0.0667 | -0.0178 | 0.1660 | 0.5000 | 0.3340 |
| Ovarian Cancer | 2.9672 | 0.0839 | 0.1941 | 0.1102 | 0.1823 | 0.4344 | 0.2521 |
| Hepatocellular Carcinoma | 3.6000 | 0.1683 | 0.2000 | 0.0317 | 0.2128 | 0.2000 | -0.0128 |
| Breast Carcinoma | 3.6360 | 0.0595 | 0.1667 | 0.1072 | 0.1250 | 0.2778 | 0.1528 |
| Cervical Cancer | 4.7368 | 0.0907 | 0.0357 | -0.0550 | 0.1515 | 0.1250 | -0.0265 |
| Esophagogastric Carcinoma | 5.0000 | 0.1084 | 0.1584 | 0.0500 | 0.1254 | 0.3663 | 0.2409 |
| Non-Small Cell Lung Cancer | 6.9139 | 0.1631 | 0.2813 | 0.1182 | 0.1083 | 0.3456 | 0.2373 |
| Bladder Cancer | 7.2535 | 0.1797 | 0.2643 | 0.0846 | 0.1276 | 0.3168 | 0.1892 |
| Small Cell Lung Cancer | 9.9000 | 0.1388 | 0.1932 | 0.0544 | 0.1365 | 0.3902 | 0.2538 |
| Melanoma | 14.4000 | 0.3862 | 0.5911 | 0.2050 | 0.1637 | 0.5216 | 0.3579 |
| Colorectal Cancer – MSI | 45.0000 | 0.3283 | 0.5462 | 0.2179 | 0.1535 | 0.3193 | 0.1658 |

**eTable 4**. Descriptive statistics of median overall survival for each tumor type within each treatment category (single: anti-PD-1/PD-L1, anti-CTLA-4; dual: anti-PD-1/PD-L1 plus anti-CTLA-4)

| **General Tumor Type** | **TMB**  **(median)** | **Statistics** | **Anti-PD-1/PD-L1 Monotherapy** | **Anti-CTLA-4 Monotherapy** | **Anti-PD-1/PD-L1 plus anti-CTLA-4 Therapy** |
| --- | --- | --- | --- | --- | --- |
| Ocular/Uveal melanoma | 1.30 | Num. of Studies | 2 | 1 | 1 |
|  |  | Mean (SD) | 10.45 (4.03) | 12.80 ( NA) | 12.70 ( NA) |
|  |  | Median (Range) | 10.45 (7.60, 13.30) | 12.80 (12.80, 12.80) | 12.70 (12.70, 12.70) |
| Mesothelioma | 1.80 | Num. of Studies | 3 | 1 | 2 |
|  |  | Mean (SD) | 11.50 (0.69) | 10.70 ( NA) | 16.25 (0.49) |
|  |  | Median (Range) | 11.90 (10.70, 11.90) | 10.70 (10.70, 10.70) | 16.25 (15.90, 16.60) |
| Pancreatic Cancer | 1.80 | Num. of Studies | 1 | 2 | 1 |
|  |  | Mean (SD) | 3.60 ( NA) | 3.80 (0.28) | 3.10 ( NA) |
|  |  | Median (Range) | 3.60 (3.60, 3.60) | 3.80 (3.60, 4.00) | 3.10 (3.10, 3.10) |
| Colorectal Cancer – MSS | 2.00 | Num. of Studies | 2 | - | 1 |
|  |  | Mean (SD) | 6.05 (1.48) | - | 6.60 ( NA) |
|  |  | Median (Range) | 6.05 (5.00, 7.10) | - | 6.60 (6.60, 6.60) |
| Sarcoma | 2.21 | Num. of Studies | 2 | - | 1 |
|  |  | Mean (SD) | 29.85 (27.08) | - | 14.30 ( NA) |
|  |  | Median (Range) | 29.85 (10.70, 49.00) | - | 14.30 (14.30, 14.30) |
| Biliary Tract Cancer | 2.50 | Num. of Studies | 3 | - | 1 |
|  |  | Mean (SD) | 10.47 (3.28) | - | 10.10 ( NA) |
|  |  | Median (Range) | 9.10 (8.10, 14.22) | - | 10.10 (10.10, 10.10) |
| Thymic | 2.50 | Num. of Studies | - | - | - |
|  |  | Mean (SD) | - | - | - |
|  |  | Median (Range) | - | - | - |
| Adrenocortical Carcinoma | 2.70 | Num. of Studies | 1 | - | - |
|  |  | Mean (SD) | 10.60 ( NA) | - | - |
|  |  | Median (Range) | 10.60 (10.60, 10.60) | - | - |
| Germ Cell Tumor | 2.70 | Num. of Studies | - | - | - |
|  |  | Mean (SD) | - | - | - |
|  |  | Median (Range) | - | - | - |
| Glioblastoma | 2.70 | Num. of Studies | 1 | - | 1 |
|  |  | Mean (SD) | 9.80 ( NA) | - | 9.20 ( NA) |
|  |  | Median (Range) | 9.80 (9.80, 9.80) | - | 9.20 (9.20, 9.20) |
| Prostate Cancer | 2.70 | Num. of Studies | - | - | - |
|  |  | Mean (SD) | - | - | - |
|  |  | Median (Range) | - | - | - |
| Renal Cell Carcinoma | 2.70 | Num. of Studies | 1 | - | - |
|  |  | Mean (SD) | 25.00 ( NA) | - | - |
|  |  | Median (Range) | 25.00 (25.00, 25.00) | - | - |
| Ovarian Cancer | 2.97 | Num. of Studies | 2 | - | - |
|  |  | Mean (SD) | 15.40 (6.51) | - | - |
|  |  | Median (Range) | 15.40 (10.80, 20.00) | - | - |
| Hepatocellular Carcinoma | 3.60 | Num. of Studies | 3 | 1 | - |
|  |  | Mean (SD) | 13.10 (0.17) | 8.20 ( NA) | - |
|  |  | Median (Range) | 13.20 (12.90, 13.20) | 8.20 (8.20, 8.20) | - |
| Nasopharyngeal | 3.60 | Num. of Studies | 1 | - | - |
|  |  | Mean (SD) | 17.10 ( NA) | - | - |
|  |  | Median (Range) | 17.10 (17.10, 17.10) | - | - |
| Breast Carcinoma | 3.64 | Num. of Studies | - | - | - |
|  |  | Mean (SD) | - | - | - |
|  |  | Median (Range) | - | - | - |
| Endometrial Cancer | 3.92 | Num. of Studies | 1 | - | - |
|  |  | Mean (SD) | 9.60 ( NA) | - | - |
|  |  | Median (Range) | 9.60 (9.60, 9.60) | - | - |
| Merkel Cell Carcinoma | 4.30 | Num. of Studies | 1 | - | - |
|  |  | Mean (SD) | 12.90 ( NA) | - | - |
|  |  | Median (Range) | 12.90 (12.90, 12.90) | - | - |
| Cervical Cancer | 4.74 | Num. of Studies | 1 | - | - |
|  |  | Mean (SD) | 9.40 ( NA) | - | - |
|  |  | Median (Range) | 9.40 (9.40, 9.40) | - | - |
| Esophagogastric Carcinoma | 5.00 | Num. of Studies | 2 | 2 | 1 |
|  |  | Mean (SD) | 5.43 (0.24) | 8.77 (5.56) | 6.90 ( NA) |
|  |  | Median (Range) | 5.43 (5.26, 5.60) | 8.77 (4.83, 12.70) | 6.90 (6.90, 6.90) |
| Head and Neck | 5.00 | Num. of Studies | 2 | - | - |
|  |  | Mean (SD) | 7.75 (0.35) | - | - |
|  |  | Median (Range) | 7.75 (7.50, 8.00) | - | - |
| Anal Cancer | 5.40 | Num. of Studies | 1 | - | - |
|  |  | Mean (SD) | 11.50 ( NA) | - | - |
|  |  | Median (Range) | 11.50 (11.50, 11.50) | - | - |
| Non-Small Cell Lung Cancer | 6.91 | Num. of Studies | 5 | - | 1 |
|  |  | Mean (SD) | 11.42 (2.91) | - | 10.90 ( NA) |
|  |  | Median (Range) | 12.00 (8.40, 15.60) | - | 10.90 (10.90, 10.90) |
| Bladder Cancer | 7.25 | Num. of Studies | 5 | - | 2 |
|  |  | Mean (SD) | 11.77 (4.22) | - | 12.40 (4.10) |
|  |  | Median (Range) | 10.30 (7.90, 18.20) | - | 12.40 (9.50, 15.30) |
| Small Cell Lung Cancer | 9.90 | Num. of Studies | 2 | - | 2 |
|  |  | Mean (SD) | 8.30 (1.13) | - | 7.90 (0.00) |
|  |  | Median (Range) | 8.30 (7.50, 9.10) | - | 7.90 (7.90, 7.90) |
| Melanoma | 14.40 | Num. of Studies | 1 | 2 | - |
|  |  | Mean (SD) | 37.60 ( NA) | 16.25 (5.16) | - |
|  |  | Median (Range) | 37.60 (37.60, 37.60) | 16.25 (12.60, 19.90) | - |
| Other MSI | 30.00 | Num. of Studies | - | - | - |
|  |  | Mean (SD) | - | - | - |
|  |  | Median (Range) | - | - | - |
| Colorectal Cancer – MSI | 45.00 | Num. of Studies | 1 | - | - |
|  |  | Mean (SD) | 31.40 ( NA) | - | - |
|  |  | Median (Range) | 31.40 (31.40, 31.40) | - | - |
| Cutaneous Squamous Cell Carcinoma | 45.20 | Num. of Studies | - | - | - |
|  |  | Mean (SD) | - | - | - |
|  |  | Median (Range) | - | - | - |

**eFigure 1**. Forest plot of response rates among studies with anti-PD-1/PD-L1 monotherapy by tumor type

**eFigure 2**. Forest plot of response rates among studies with anti-CTLA-4 monotherapy by tumor type

**eFigure 3**. Forest plot of response rates among studies with anti-PD-1/PD-L1 plus anti-CLTA-4 therapy by tumor type

**eFigure 4**. Forest plot of toxicity rates among studies with anti-PD-1/PD-L1 monotherapy by tumor type

**eFigure 5**. Forest plot of toxicity rates among studies with anti-CTLA-4 monotherapy by tumor type

**eFigure 6**. Forest plot of toxicity rates among studies with anti-PD-1/PD-L1 plus anti-CLTA-4 therapy by tumor type

**eFigure 7**. Forest plot of hazard ratios for overall survival among studies with anti-PD-1/PD-L1 monotherapy
